# Supplementary material for: Chemical Constituents from Uapaca guineensis (Phyllanthaceae), and the Computational Validation of Their Antileishmanial and Anti-inflammatory Potencies
Source: Hindawi journal article supplement (doi:10.1155/2022/7087110), 2022-10-26
Supplement: f1 [file 7087110.f1.docx]

**SUPPLEMENTARY MATERIAL**

**Chemical constituents from *Uapaca guineensis* (Phyllanthaceae) and the computational validation of their anti-leshmanial and anti-inflammatory potencies**

Gervais Mouthé Happi1,*, Mireille Towa Yimtchui2, Sikiru Akinyeye Ahmed3, Shina Salau3, Liliane Clotilde Dzouemo2, Klev Gaïtan Sikam2, Jean Duplex Wansi2

1*Department of Chemistry, Higher Teacher Training College, The University of Bamenda, P.O Box 39 Bambili, Cameroon*

2*Department of Chemistry, Faculty of Sciences, University of Douala, P.O. Box 24157 Douala, Cameroon*

3*Department of Chemistry and Industrial Chemistry, Kwara State University, Malete, P.M.B 1530 Ilorin, 23431, Nigeria*

**Table of Contents**

**Section A : Molecular docking Data**

**Figure 1S**: Graphical relationship between isolated compounds and Binding affinity (or Binding energy)

**Table 1S**: Simile notations of the isolated compounds used for ADMET studies

**Table 2S**: 2D-plot Binding interactions between isolated compounds and selected receptors

**Section B : NMR Spectra of isolated compounds**

**Figure 2S** : 1H NMR spectrum of lupeol (**1**) in CDCl3

**Figure 3S**: 13C NMR spectrum of lupeol (**1**) in CDCl3

**Figure 4S**: 1H NMR spectrum of betulin (**2**) in CDCl3

**Figure 5S**: 13C NMR spectrum of betulin (**2**) in CDCl3

**Figure 6S** : 1H NMR spectrum of betulinic acid (**3**) in CD3OD+CDCl3

**Figure 7S** : 13C NMR spectrum of betulinic acid (**3**) in CD3OD+CDCl3

**Figure 8S** : 1H NMR spectrum of *β*-amyryl acetate (**4**) in CDCl3

**Figure 9S** : Enlarged 1H NMR spectrum of *β*-amyryl acetate (**4**) in CDCl3

**Figure 10S** : 13C NMR spectrum of *β*-amyryl acetate (**4**) in CDCl3

**Figure 11S** : 1H NMR spectrum of physcion (**5**) in CDCl3

**Figure 12S** : 13C NMR spectrum of physcion (**5**) in CDCl3

**Figure 13S** : 1H NMR spectrum of quercetin (**6**) in CD3OD+CDCl3

**Figure 14S** : 13C NMR spectrum of quercetin (**6**) in CD3OD+CDCl3

**Figure 15S** : 1H NMR spectrum of rutin (**7**) in CD3OD

**Figure 16S** : 13C NMR spectrum of rutin (**7**) in CD3OD

**Figure 17S** : 13C DEPT 135 NMR spectrum of rutin (**7**) in CD3OD

**Figure 18S** : 1H NMR spectrum of *β*-sitosterol (**8**) in CD3OD

**Figure 19S** : EI-MS spectrum of *β*-sitosterol (**8**)

**Figure 20S** : 1H NMR spectrum of daucosterol (**9**) in CD3OD+CDCl3

**Figure 21S** : 13C NMR spectrum of daucosterol (**9**) in CD3OD+CDCl3

**Figure 22S** : 13C DEPT 135 NMR spectrum of daucosterol (**9**) in CD3OD+CDCl3

**Section A : Molecular docking Data**


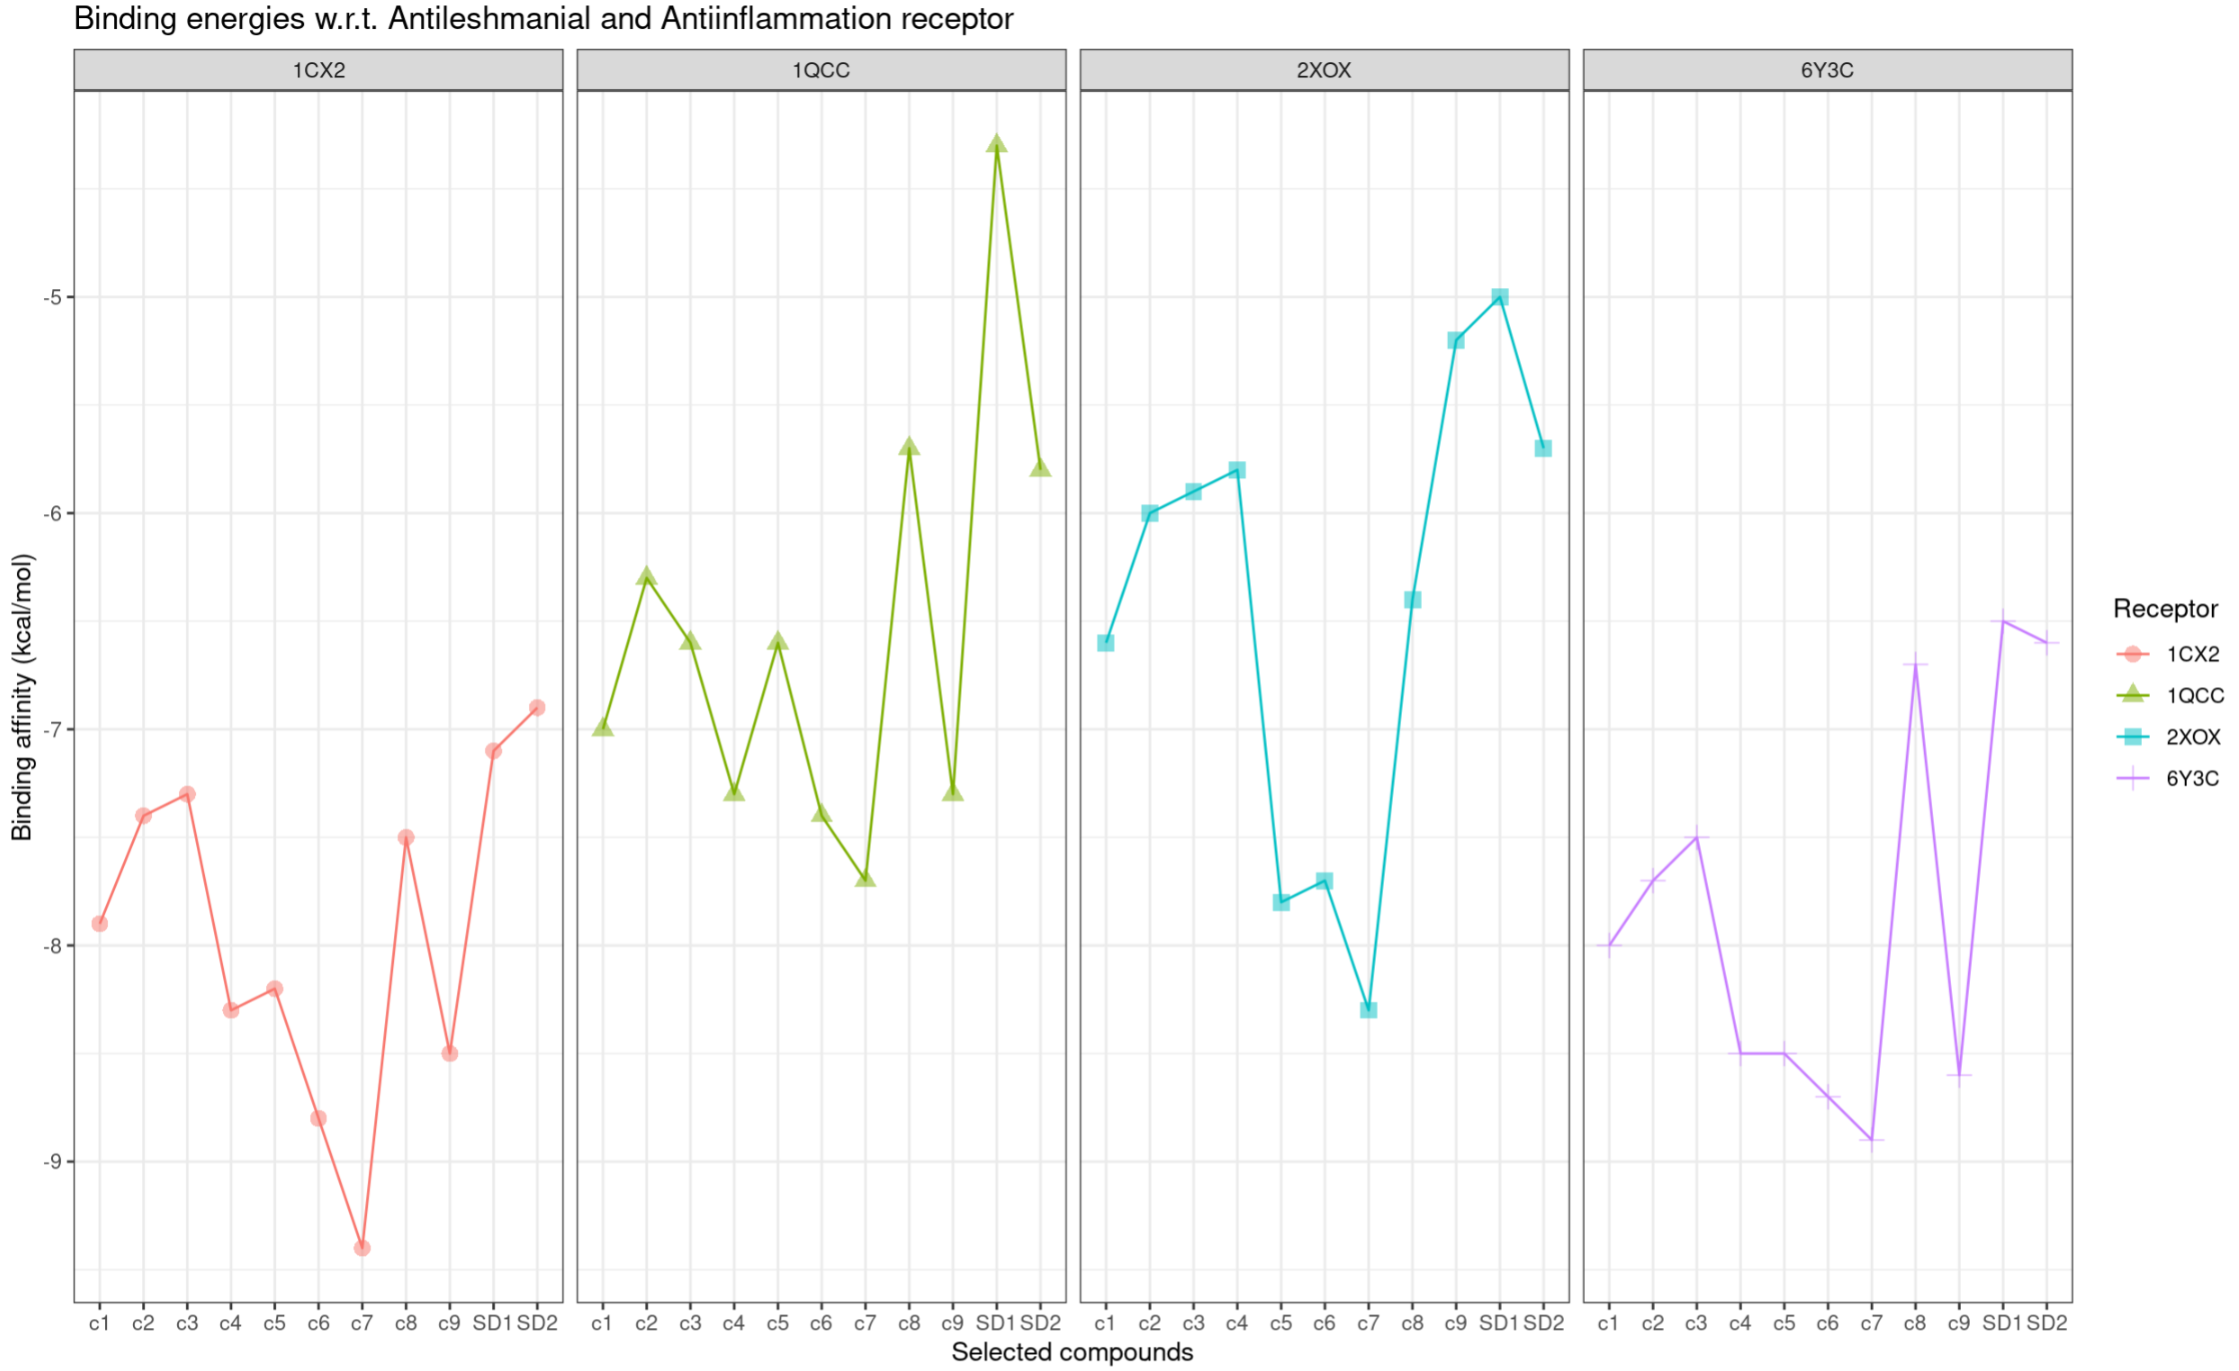
**Figure 1S:** Graphical relationship between isolated compounds and Binding affinity (Binding energy).

**Table 1S:** Simile notations of the isolated compounds used for ADMET studies

| **S/N** | **Compound** | **SMILE NOTATION** |
| --- | --- | --- |
| **1** | c1 | C1[C@@H](C([C@H]2[C@@](C1)([C@H]1[C@](CC2)([C@]2([C@@H](CC1)[C@H]1[C@](CC2)(CC[C@H]1C(=C)C)C)C)C)C)(C)C)O |
| **2** | c2 | C1[C@@H](C([C@H]2[C@@](C1)([C@H]1[C@](CC2)([C@]2([C@@H](CC1)[C@H]1[C@](CC2)(CC[C@H]1C(=C)C)CO)C)C)C)(C)C)O |
| **3** | c3 | C1[C@@H](C([C@H]2[C@@](C1)([C@H]1[C@](CC2)([C@]2([C@@H](CC1)[C@H]1[C@](CC2)(CC[C@H]1C(=C)C)C(=O)O)C)C)C)(C)C)O |
| **4** | c4 | C1[C@@H](C([C@H]2[C@@](C1)([C@H]1[C@](CC2)([C@]2(C(=CC1)[C@H]1[C@](CC2)(CCC(C1)(C)C)C)C)C)C)(C)C)OC(=O)C |
| **5** | c5 | c1c(cc2c(c1O)C1=C3C(=CC(=C[C@@]3(O1)O)C)C2=O)OC |
| **6** | c6 | c1(cc(c2c(c1)oc(c(c2=O)O)c1cc(c(cc1)O)O)O)O |
| **7** | c7 | c1(cc(c2c(c1)oc(c(c2=O)O[C@H]1[C@H]([C@@H]([C@@H]([C@H](O1)CO[C@H]1[C@H]([C@H]([C@H]([C@@H](O1)C)O)O)O)O)O)O)c1cc(c(cc1)O)O)O)O |
| **8** | c8 | C1[C@@H](CC2=CC[C@@H]3[C@@H]([C@]2(C1)C)CC[C@]1([C@@H]3CC[C@@H]1[C@@H](CC[C@@H](CC)C(C)C)C)C)O |
| **9** | c9 | C1[C@@H](CC2=CC[C@H]3[C@@H]([C@]2(C1)C)CC[C@]1([C@@H]3CC[C@@H]1[C@@H](CC[C@@H](CC)C(C)C)C)C)O[C@@H]1O[C@@H]([C@H]([C@H]([C@@H]1O)O)O)CO |
| **10** | SD1 | C(CCCCCCCCCCCCCCO[P@](=O)([O-])OCC[N+](C)(C)C)C |
| **11** | SD2 | c1cccc(c1C(=O)O)OC(=O)C |

SD: Standard Drug

**Table 2S:** 2D-plot Binding interactions between isolated compounds and selected receptors

| **Compounds** | **Anti-leshmanial receptors** | | **Anti-inflammatory receptors** | |
| --- | --- | --- | --- | --- |
| **1QCC** | **2XOX** | **6Y3C** | **1CX2** |
| **1** | 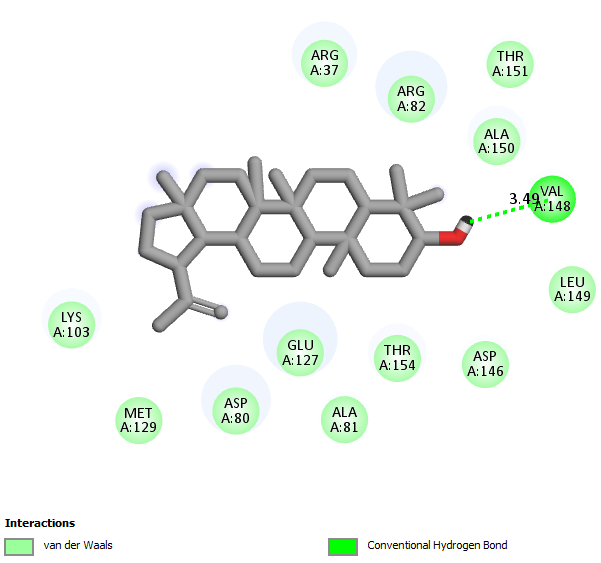 | 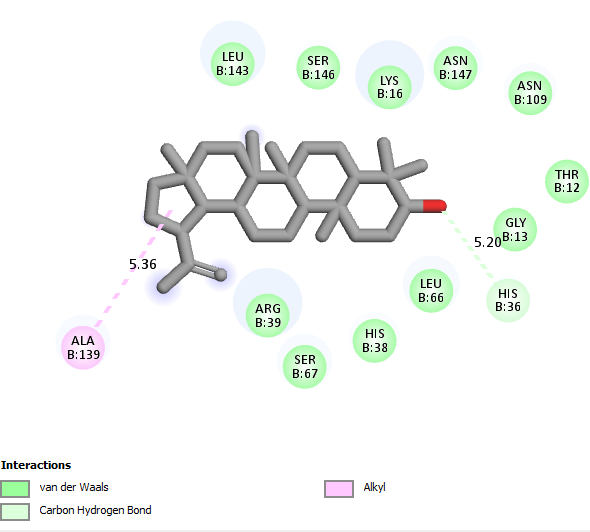 | 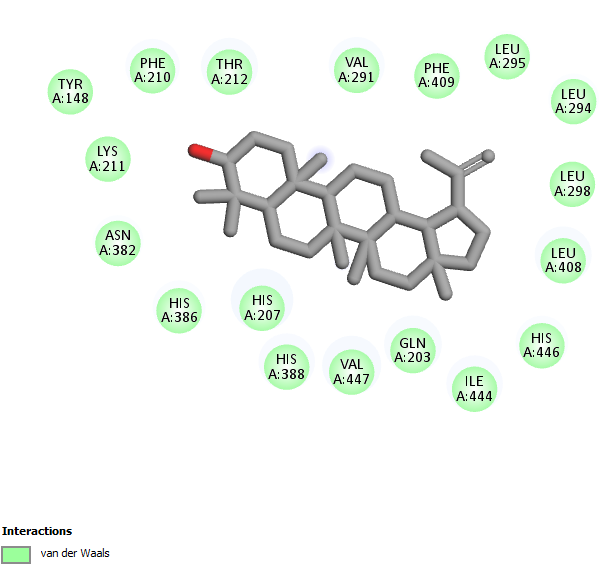 | 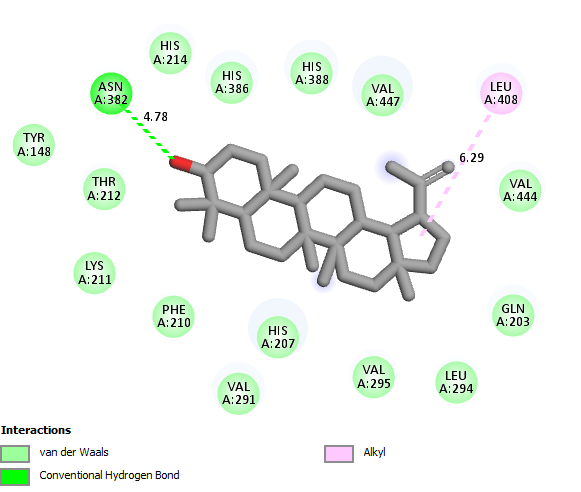 |
| **2** | 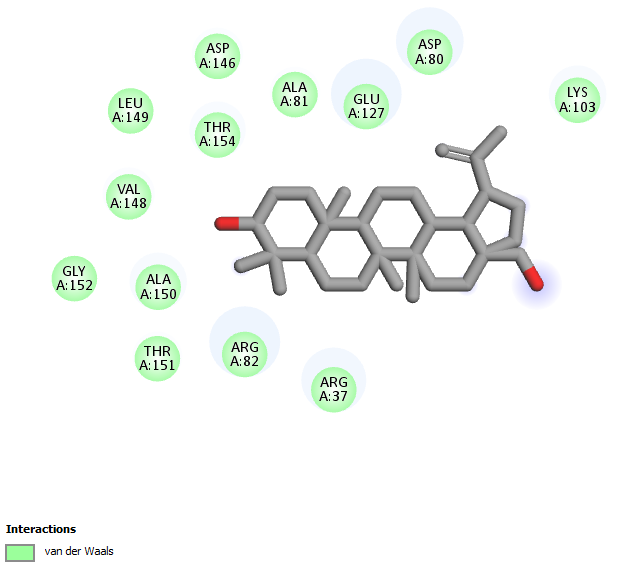 | 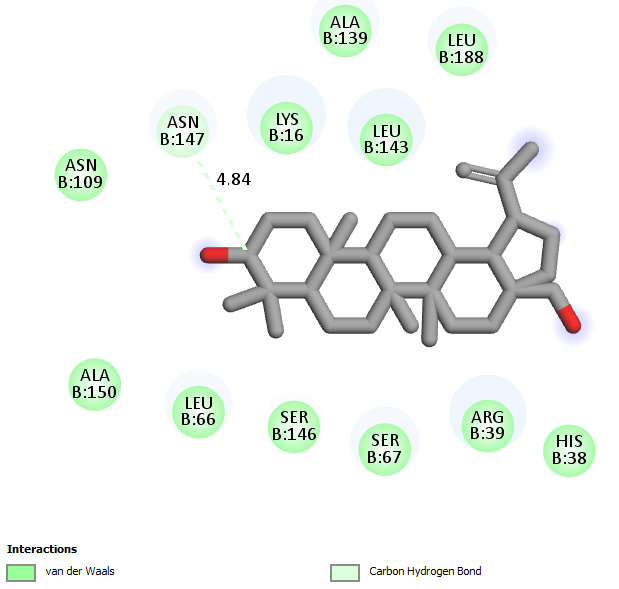 | 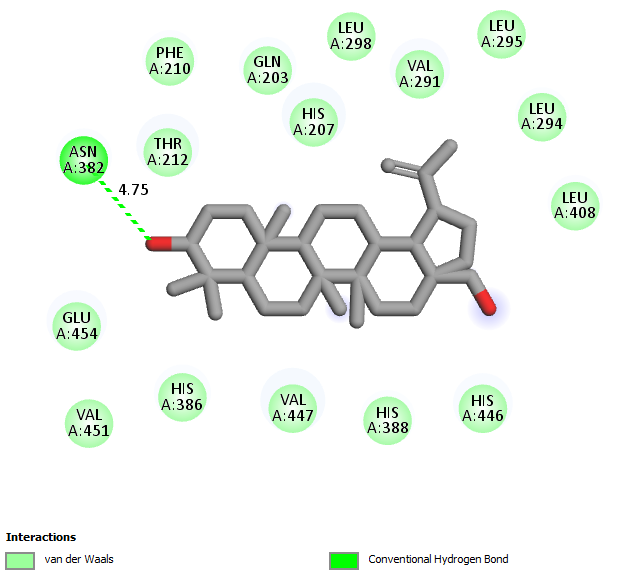 | 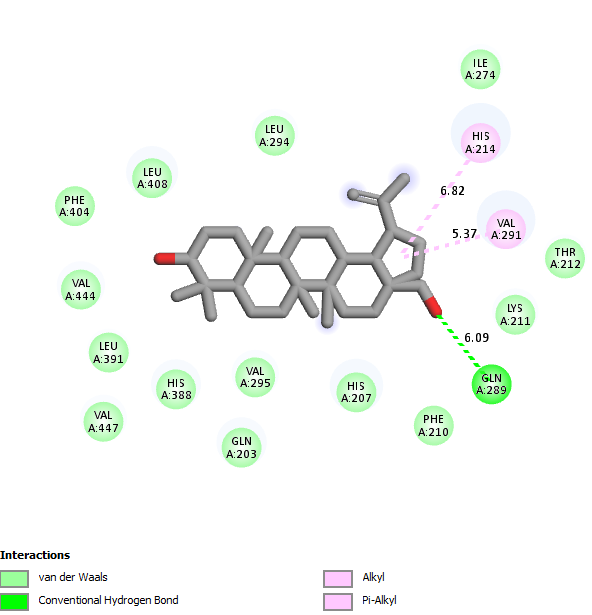 |
| **3** | 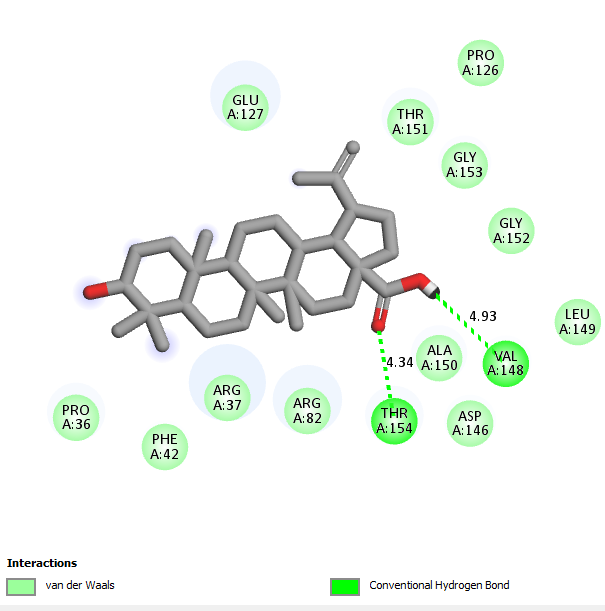 | 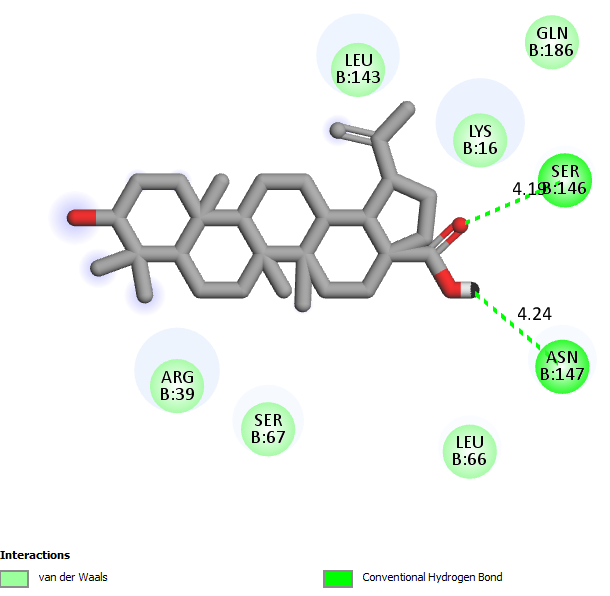 | 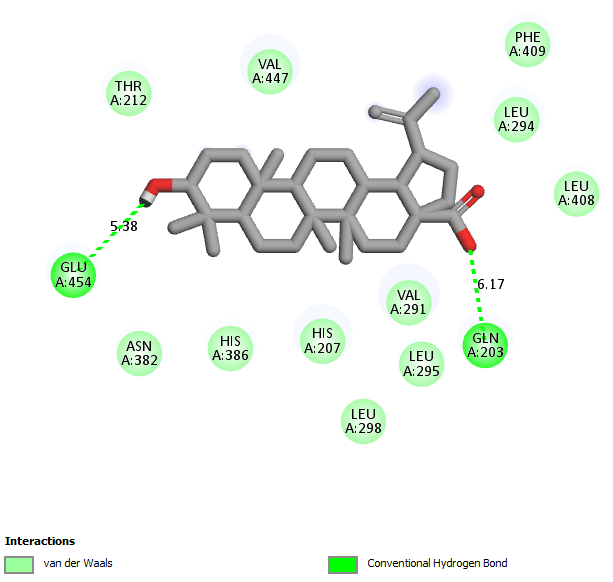 | 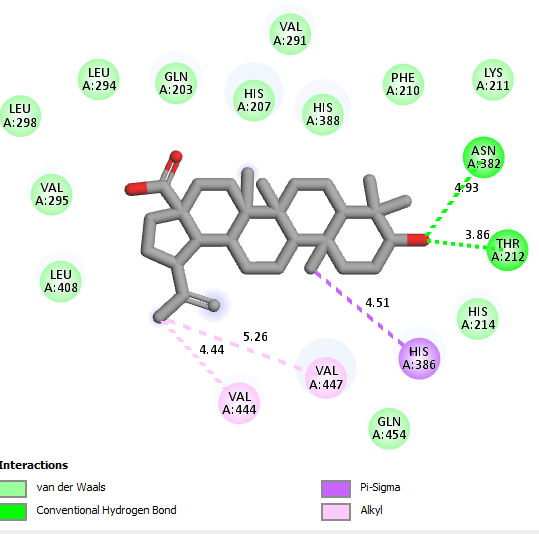 |
| **4** | 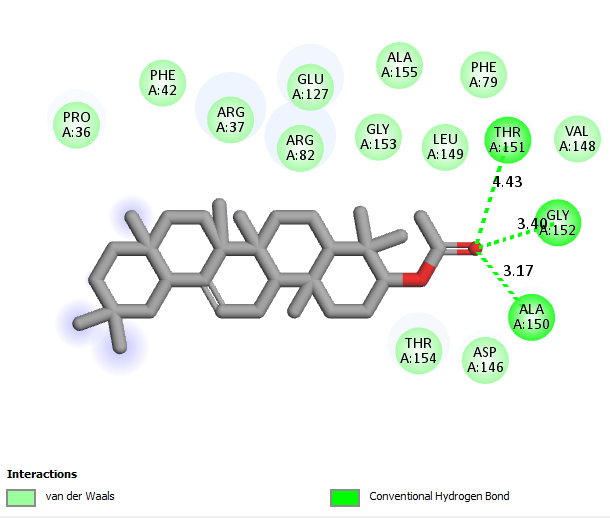 | 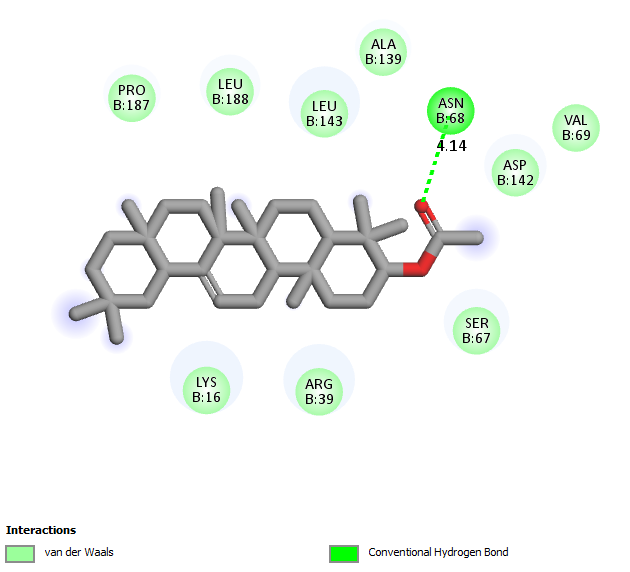 | 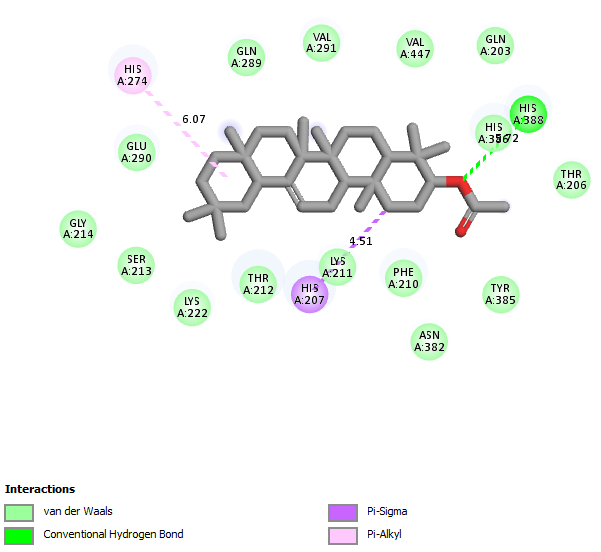 | 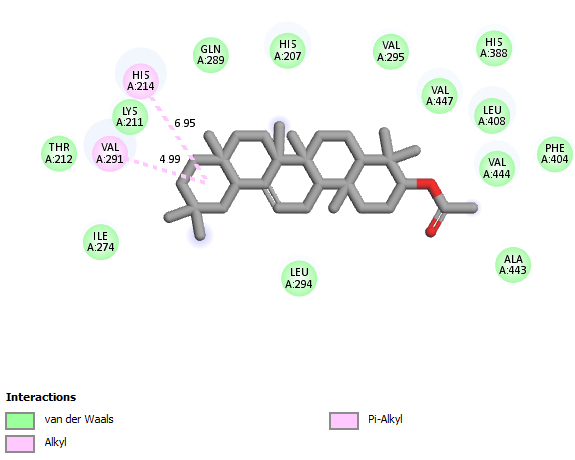 |
| **5** | 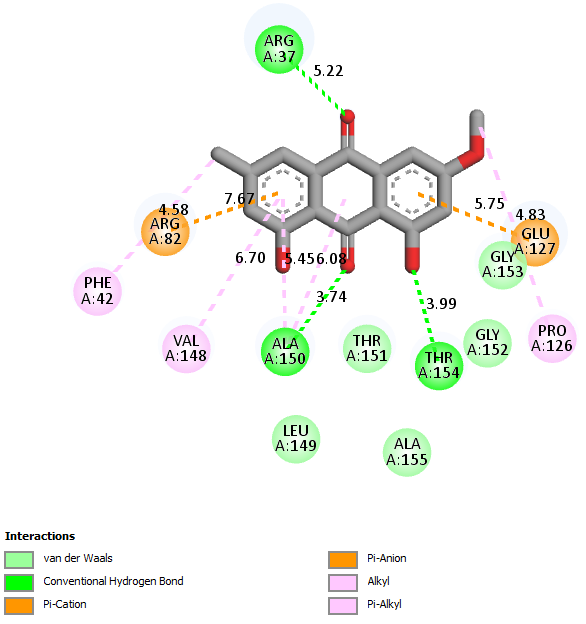 | 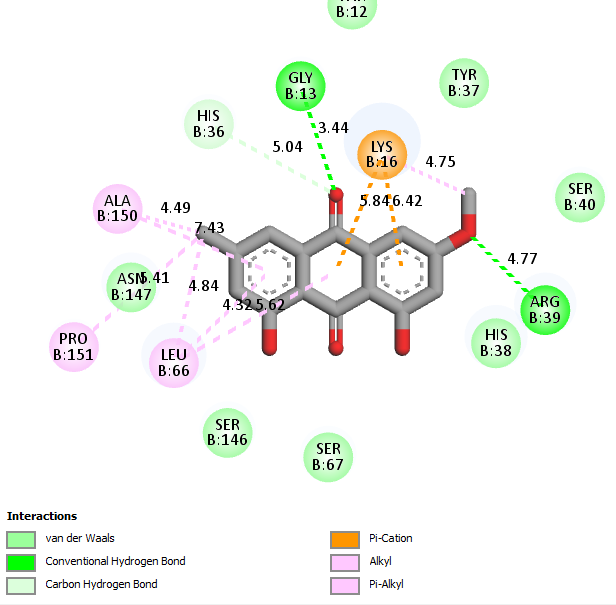 | 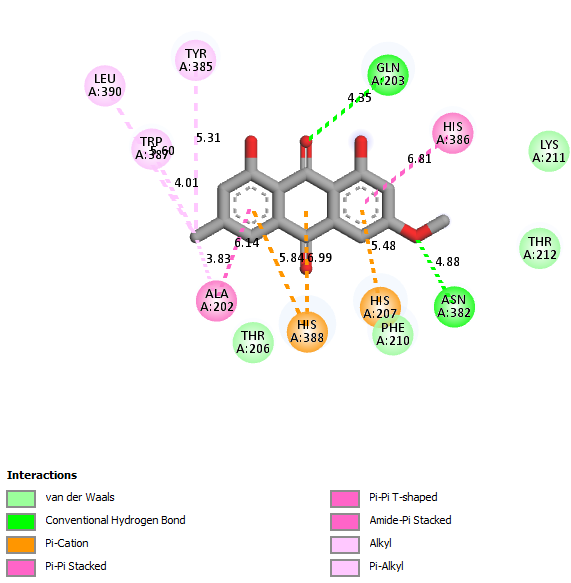 | 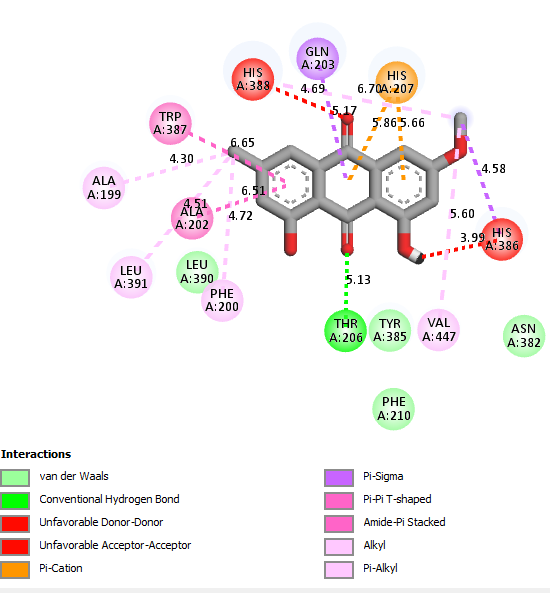 |
| **6** | 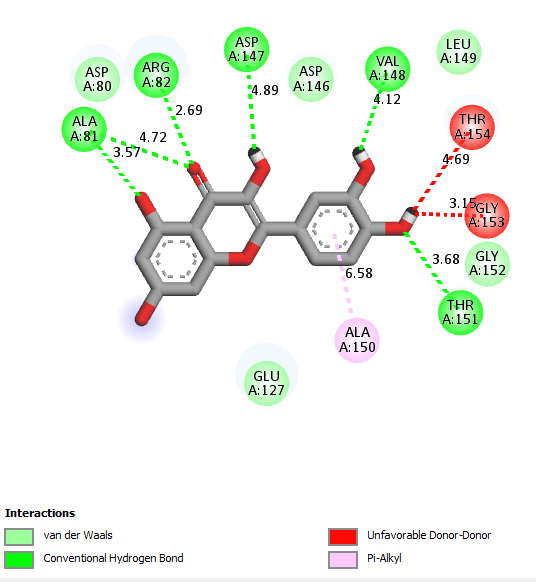 | 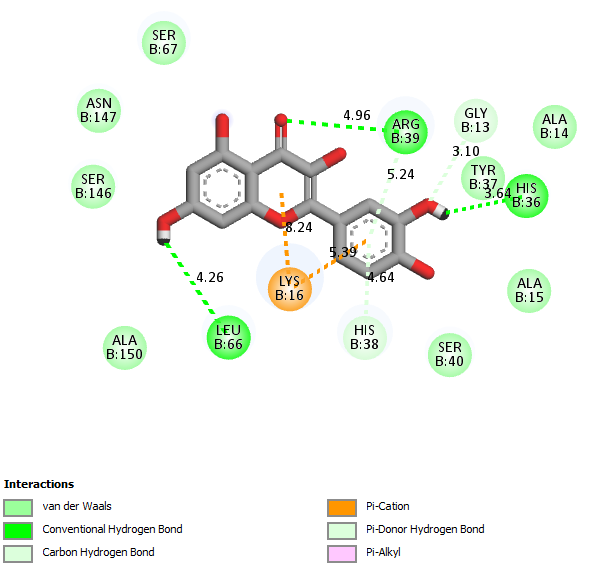 | 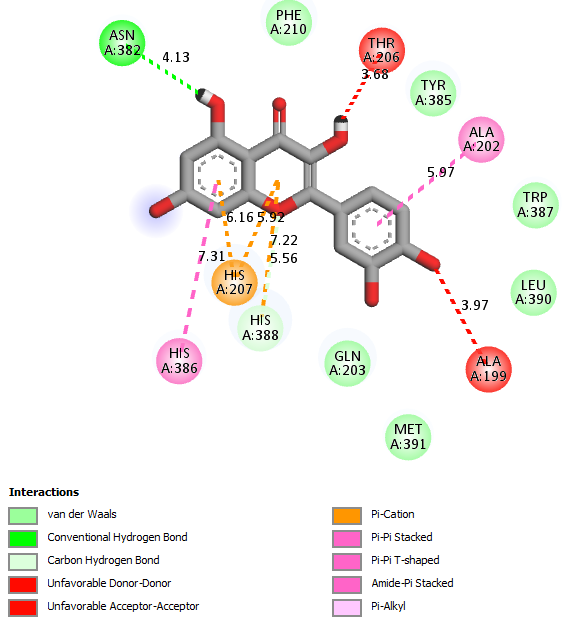 | 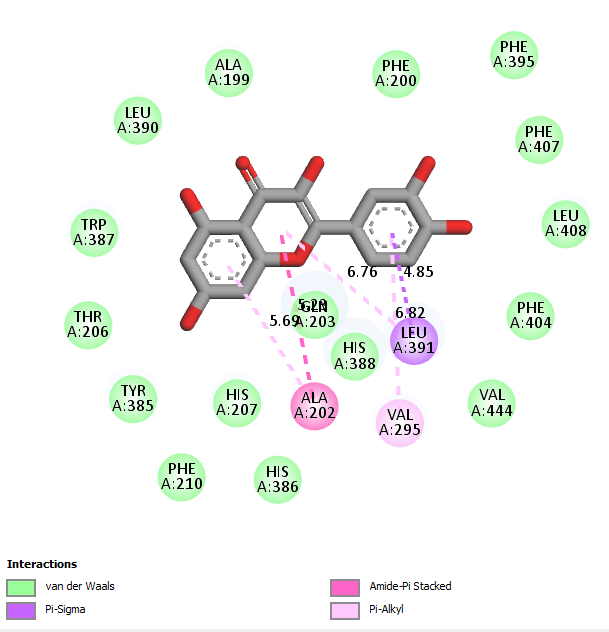 |
| **7** | 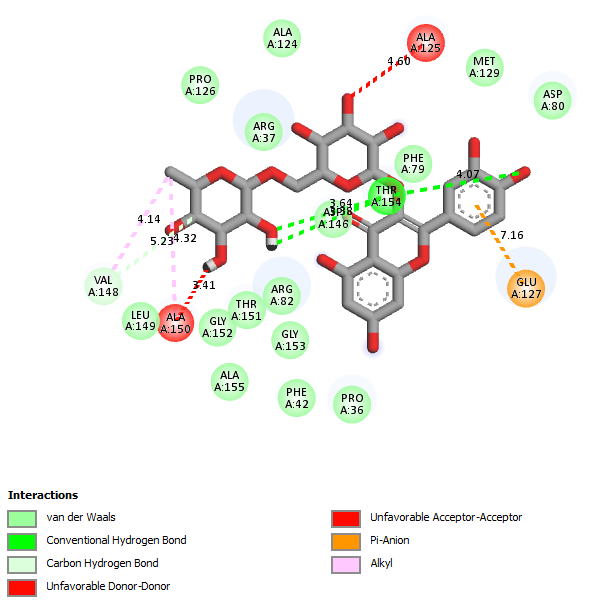 | 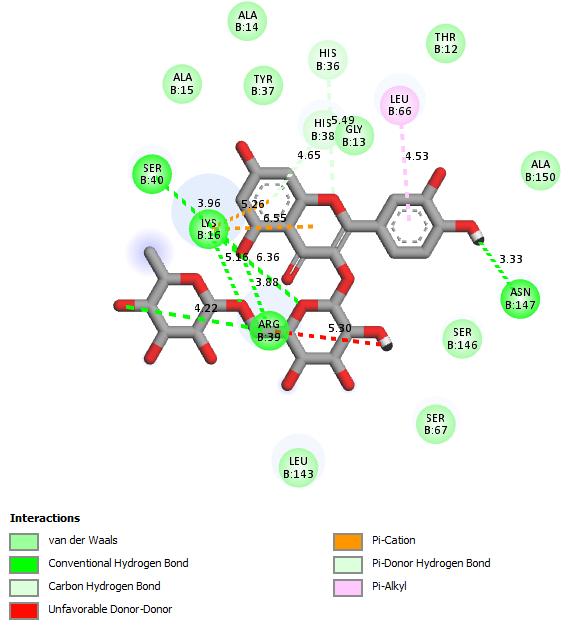 | 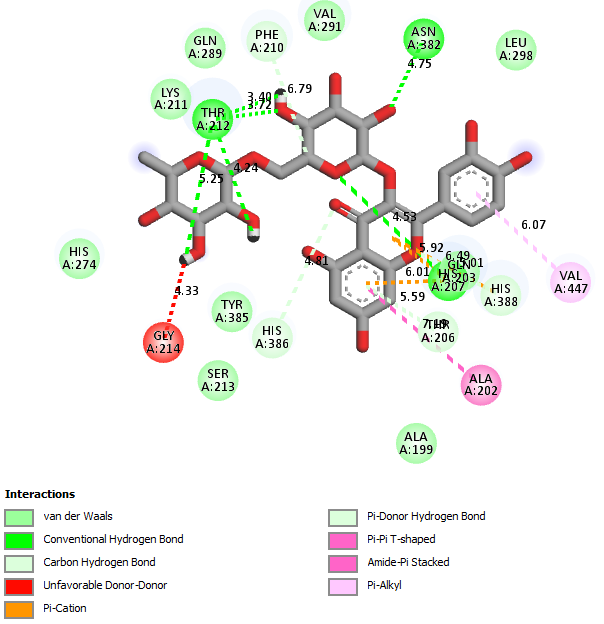 | 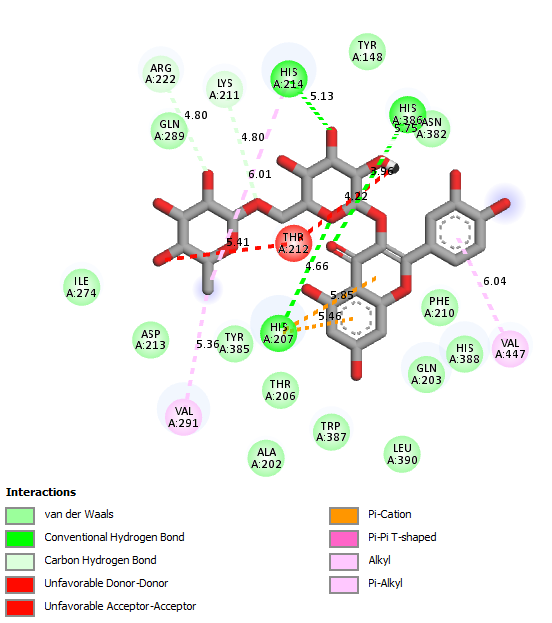 |
| **8** | 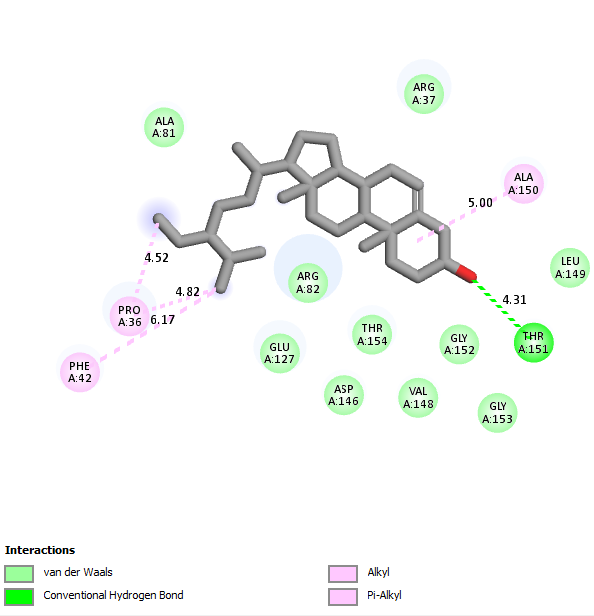 | 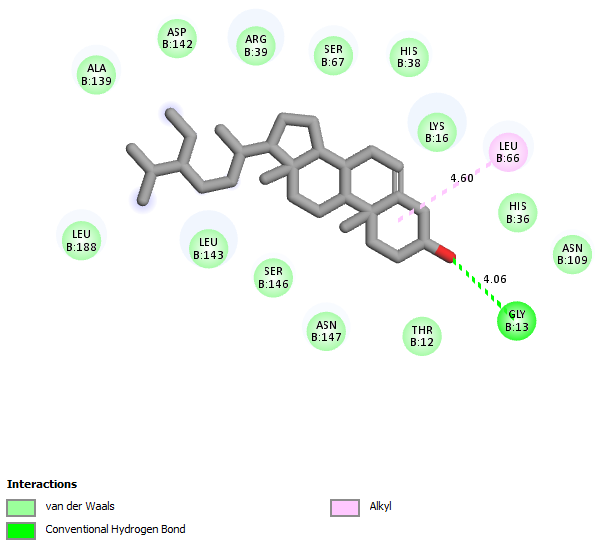 | 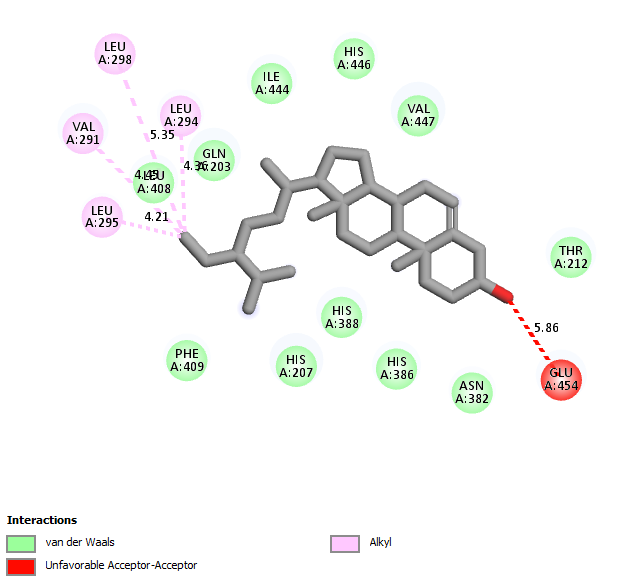 | 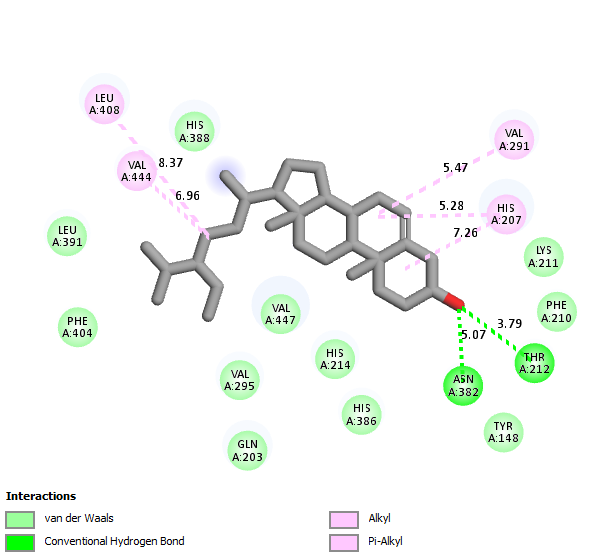 |
| **9** | 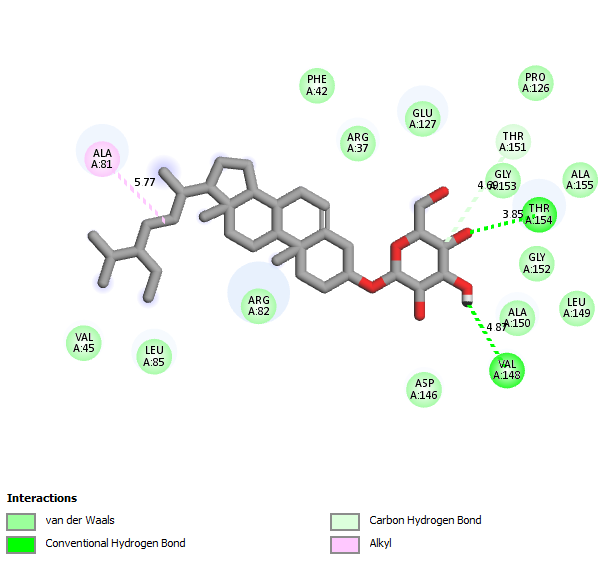 | 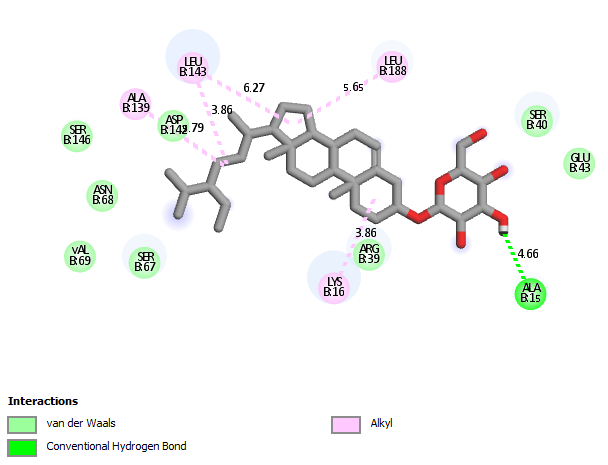 | 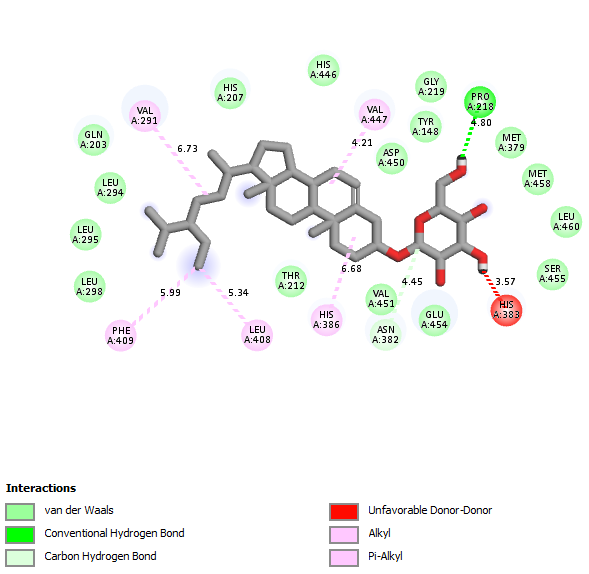 | 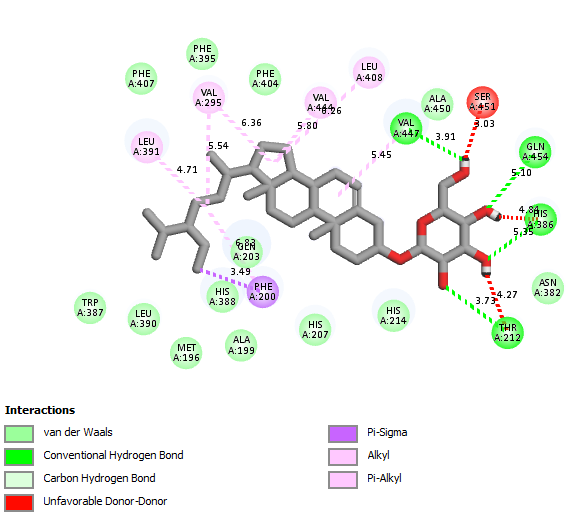 |
| **SD1 =**  **Miltefosine** | 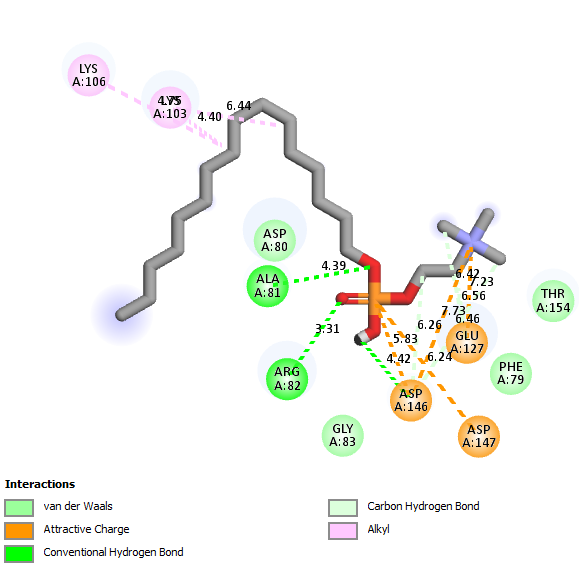 | 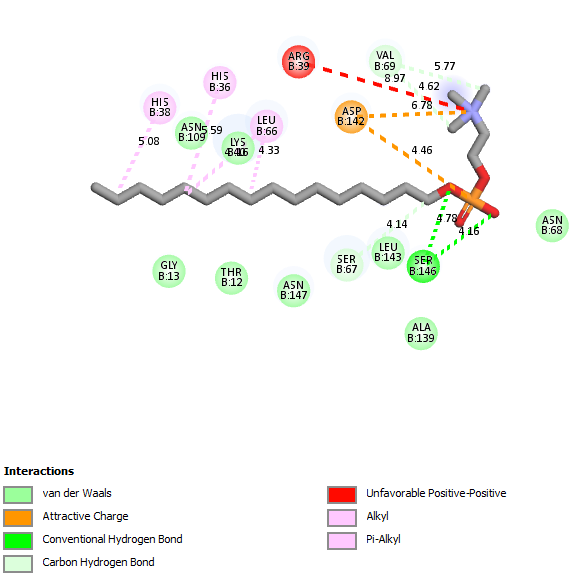 | 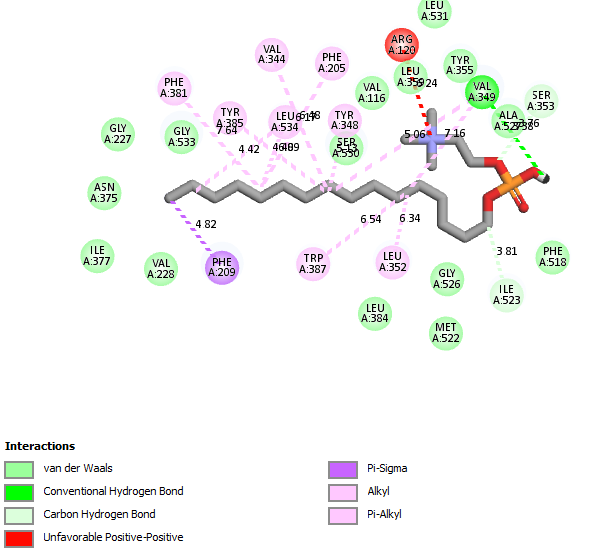 | 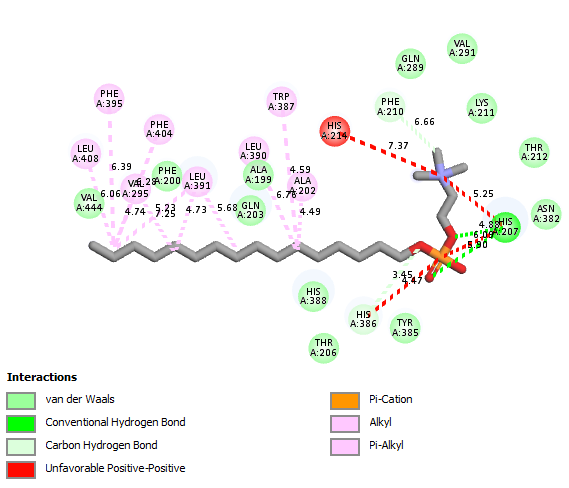 |
| **SD2 =**  **aspirin** | 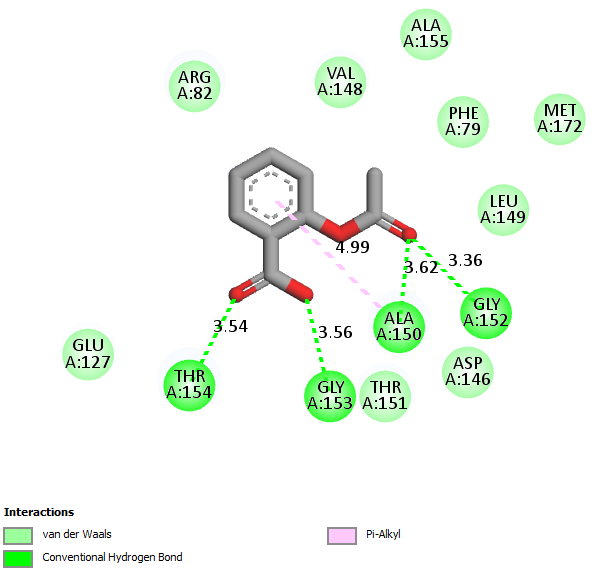 | 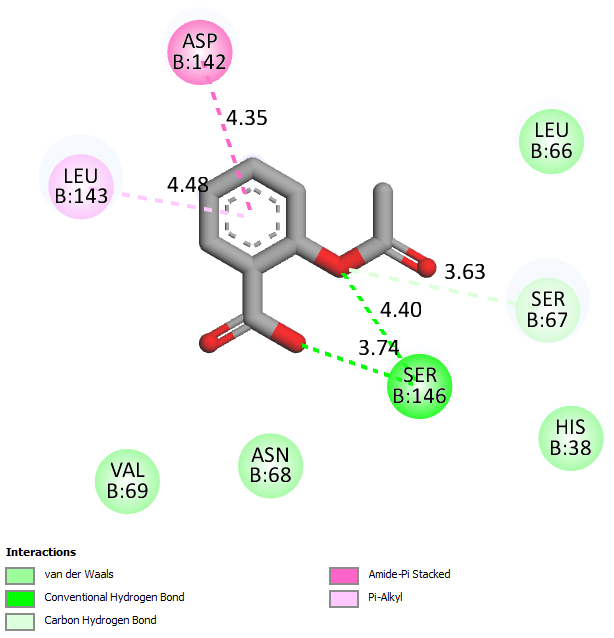 | 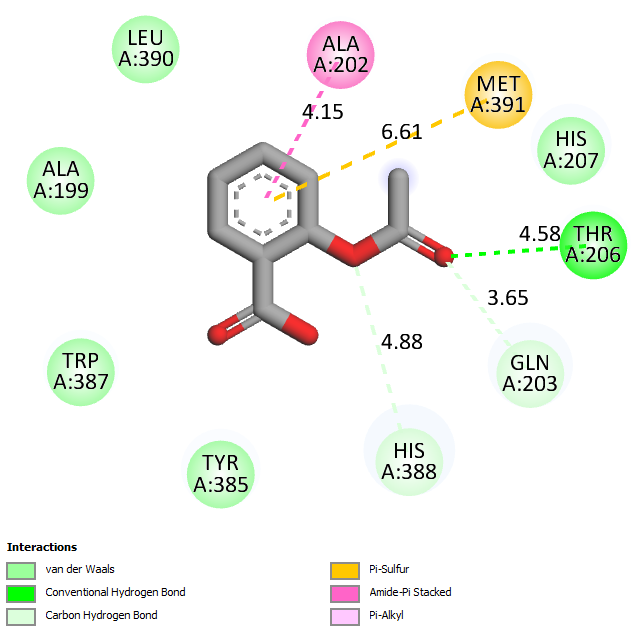 | 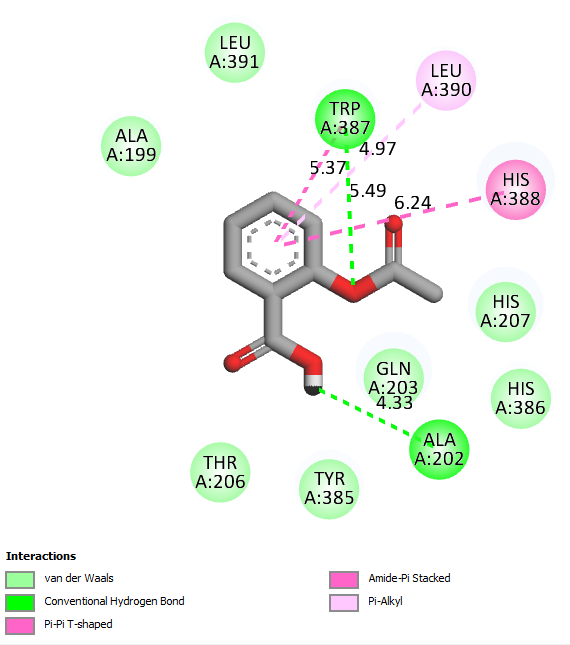 |

SD : Standard Drug

**Section B : NMR Spectra of isolated compounds**

**Figure 2S** : 1H NMR spectrum of lupeol (**1**) in CDCl3

**Figure 3S**: 13C NMR spectrum of lupeol (**1**) in CDCl3

**Figure 4S**: 1H NMR spectrum of betulin (**2**) in CDCl3

**Figure 5S**: 13C NMR spectrum of betulin (**2**) in CDCl3

**Figure 6S** : 1H NMR spectrum of betulinic acid (**3**) in CD3OD+CDCl3

**Figure 7S** : 13C NMR spectrum of betulinic acid (**3**) in CD3OD+CDCl3

**Figure 8S** : 1H NMR spectrum of *β*-amyryl acetate (**4**) in CDCl3

**Figure 9S** : Enlarged 1H NMR spectrum of *β*-amyryl acetate (**4**) in CDCl3

**Figure 10S** : 13C NMR spectrum of *β*-amyryl acetate (**4**) in CDCl3

**Figure 11S** : 1H NMR spectrum of physcion (**5**) in CDCl3

**Figure 12S** : 13C NMR spectrum of physcion (**5**) in CDCl3

**Figure 13S** : 1H NMR spectrum of quercetin (**6**) in CD3OD+CDCl3

**Figure 14S** : 13C NMR spectrum of quercetin (**6**) in CD3OD+CDCl3

**Figure 15S** : 1H NMR spectrum of rutin (**7**) in CD3OD

**Figure 16S** : 13C NMR spectrum of rutin (**7**) in CD3OD

**Figure 17S** : 13C DEPT 135 NMR spectrum of rutin (**7**) in CD3OD

**Figure 18S** : 1H NMR spectrum of *β*-sitosterol (**8**) in CD3OD


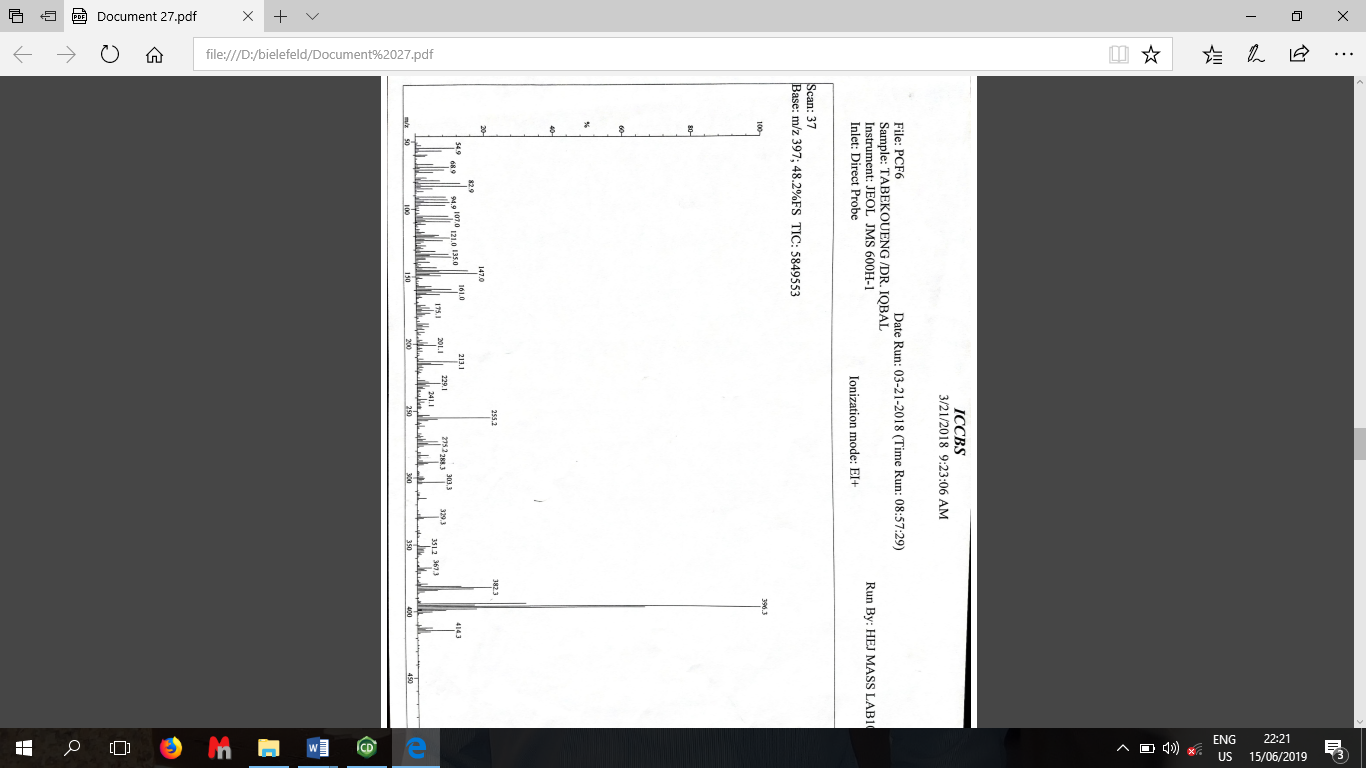


**Figure 19S** : EI-MS spectrum of *β*-sitosterol (**8**)

**Figure 20S** : 1H NMR spectrum of *β*-sitosterol-3-*O*-*β*-D-glucopyranoside (**9**) in CD3OD+CDCl3

**Figure 21S** : 13C NMR spectrum of *β*-sitosterol-3-*O*-*β*-D-glucopyranoside (**9**) in CD3OD+CDCl3

**Figure 22S** : 13C DEPT 135 NMR spectrum of *β*-sitosterol-3-*O*-*β*-D-glucopyranoside (**9**) in CD3OD+CDCl3
